# Supplementary material for: Illness progression in chronic fatigue syndrome: a shifting immune baseline
Source: Springer Nature journal article supplement (doi:10.1186/s12865-016-0142-3), 2016-03-10
Supplement: MOESM2 [file 9736232]

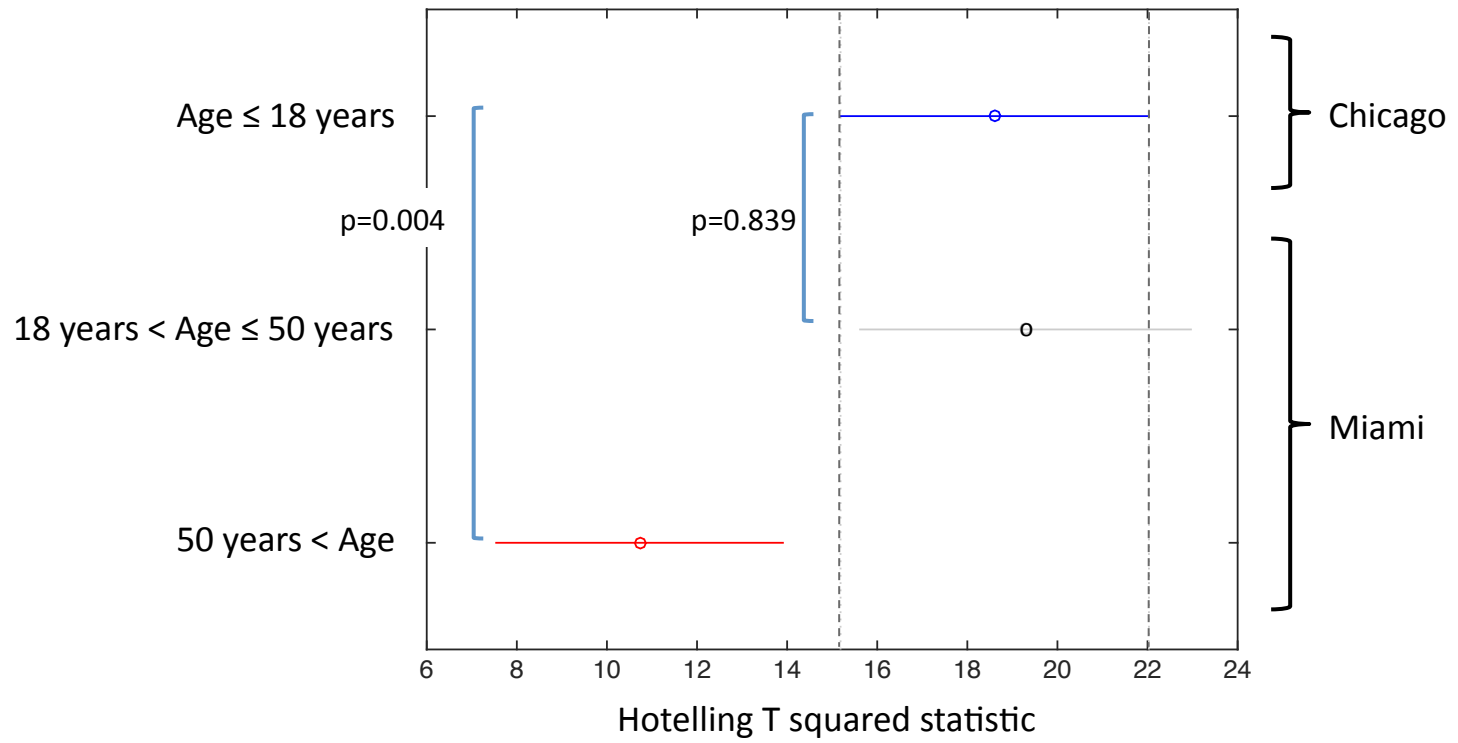

Figure S1
